# Supplementary material for: Dynamic BUN Patterns in the ICU: Risk Stratification and Prognosis Following Cardiac Surgery
Source: Research Square preprint supplement (doi:10.21203/rs.3.rs-6794317/v1), 2025-07-23
Supplement: Supplementary file 1 [file 4c1991ccf0e24ddba4c1b1d1.docx]

Supplementary Material

**Table S1. The cardiac surgery codes used in this study.**

| **ICD - 9** | **ICD - 10** |
| --- | --- |
| 3596,3525,3526,3509,3511,3500,3523,3603,3614,3522,3533,3612 | 02WF08Z,027J3ZZ,02QH3ZZ,0210088,025F3ZZ,021248F,0210493,02CH0ZZ,0213488,027F3DZ,02WG48Z,021308F,0211498,0211093,02QF0ZJ,02114AF,02100A3,027H34Z,021148F,021349C,02104AW,02BF0ZZ,02134ZC,02110KF,02UF4JJ,027J4DZ,02WJ4JZ,02LH4CZ,02NH0ZZ,021249W,021248W,025H3ZZ,02QJ3ZZ,021209F,021109C,025F4ZZ,02134AW,02UG48Z,02RH48Z,02134KW,0210444,02110K3,02CF0ZZ,02RG0JZ,024G0K2,02UJ3JG,0212083,02130Z3,021009W,02UF38J,02110A3,02110A8,02124K3,02130K3,02WG3JZ,02RF4JZ,02130AC,027G34Z,02BH3ZX,02130AW,02QF4ZJ,02WJ4KZ,02133D4,02WH4JZ,02RJ08Z,02UJ4KZ,027J44Z,02RG4JZ,02RF37H,02QF0ZZ,02104J8,02WG3KZ,0210499,02BJ0ZZ,02100JC,02UF47J,0213493,0212099,02RH38H,02LH3CZ,02120J3,0211493,021208W,021108W,02NH4ZZ,02UG37E,02CG3ZZ,02RH38M,027F4DZ,02UG3JZ,02104A3,02QJ0ZZ,02RJ3JZ,02120JW,0211088,027F3ZZ,02RF08N,02RF38N,02UF4JZ,02134KC,02LH4DZ,0210099,02110JF,027J0ZZ,02124AF,02130J9,02UH0JZ,02124K8,02110ZC,02120Z9,025G3ZZ,02UJ4KG,02104D4,021308W,0213499,02134A9,02UH08Z,02124Z9,02134AC,02110J3,02RF3KH,02WH0JZ,02BJ0ZX,0211489,027F44Z,02110K9,02BJ3ZZ,021149C,02UH3JZ,02RF07Z,02RJ07Z,02WF0KZ,02130AF,02130Z9,0211083,02UH47Z,02UF08J,02123D4,02RF3JH,02104Z9,02TH4ZZ,02UJ37Z,0212488,02134J3,027F34Z,02BF3ZZ,02VG4ZZ,02WG4JZ,02WH3JZ,02UJ07G,02UG0KE,02114JC,02RX08Z,02UJ0KG,0213089,02134K8,02RG08Z,02UG0JZ,02UG3KZ,02120JC,02100A8,02BH4ZX,02NF3ZZ,02RJ38H,02114K3,02BG0ZZ,02QG4ZE,0211098,02134Z3,02114JW,02134JW,02CH3ZZ,02124KF,021009C,02114A9,021008W,02BF3ZX,02UG38Z,02100Z9,02UG47E,02BJ3ZX,02TH3ZZ,02124J3,02104A8,02110ZF,02UF0KZ,02BH3ZZ,02104AF,02124AW,02UF47Z,02100ZC,02RJ47Z,02QH0ZZ,02110JC |

**Table S2. Mean posterior probability of the four trajectory classes**

| **Class** | **Prob1** | **Prob2** | **Prob3** | **Prob4** |
| --- | --- | --- | --- | --- |
| class1 | 0.8518 | 0.1065 | 0.0226 | 0.0191 |
| class2 | 0.1291 | 0.8652 | 0.0051 | 0.0005 |
| class3 | 0.0813 | 0.0142 | 0.8974 | 0.0071 |
| class4 | 0.0887 | 0.0099 | 0.0135 | 0.8878 |

**Table S3. Results of subgroup analysis.**

|  | **Class 2**  **(n=660)** |  | **Class 1**  **(n=378)** | |  | **Class 3**  **(n=72)** | |  | **Class 4**  **(n=36)** | | **p for interaction** |
| --- | --- | --- | --- | --- | --- | --- | --- | --- | --- | --- | --- |
| Variables | SHR |  | SHR (95% CI) | p |  | SHR (95% CI) | p |  | SHR (95% CI) | p |  | |
| Age (years) |  |  |  |  |  |  |  |  |  |  |  | |
| >65 | 1 (Ref) |  | 1.83 (1.14 - 2.93) | 0.012 |  | 3.01 (1.54, 5.87) | 0.001 |  | 2.59 (0.97, 6.86) | 0.056 | 0.997 | |
| ≤65 | 1 (Ref) |  | 2.77 (0.63, 12.06) | 0.176 |  | 3.64 (0.60, 21.90) | 0.159 |  | 1.28 (0.17, 9.76) | 0.810 |  | |
| Gender (female) |  |  |  |  |  |  |  |  |  |  | 0.07 | |
| No | 1 (Ref) |  | 2.94 (1.59, 5.44) | 0.001 |  | 4.39 (1.89, 10.17) | 0.001 |  | 4.92 (1.79, 13.51) | 0.002 |  | |
| Yes | 1 (Ref) |  | 1.12 (0.57, 2.23) | 0.741 |  | 1.82 (0.65, 5.15) | 0.256 |  | 0.62 (0.07, 5.23) | 0.657 |  | |
| Race (white) |  |  |  |  |  |  |  |  |  |  |  | |
| No | 1 (Ref) |  | 1.09 (0.43, 2.74) | 0.858 |  | 2.62 (0.82, 8.31) | 0.103 |  | 1.52 (0.28, 8.15) | 0.627 | 0.19 | |
| Yes | 1 (Ref) |  | 2.20 (1.34, 3.61) | 0.002 |  | 3.03 (1.44, 6.38) | 0.004 |  | 2.91 (1.03, 8.29) | 0.045 |  | |
| Myocardial infarction |  |  |  |  |  |  |  |  |  |  |  | |
| No | 1 (Ref) |  | 1.44 (0.81, 2.59) | 0.217 |  | 1.75 (0.78, 3.96) | 0.176 |  | 2.09 (0.67, 6.54) | 0.205 | 0.90 | |
| Yes | 1 (Ref) |  | 2.17 (1.10, 4.30) | 0.026 |  | 4.06 (1.43, 11.48) | 0.008 |  | 2.13 (0.49, 9.19) | 0.311 |  | |
| Congestive heart failure |  |  |  |  |  |  |  |  |  |  |  | |
| No | 1 (Ref) |  | 2.44 (1.07, 5.59) | 0.035 |  | 4.38 (1.01, 18.93) | 0.048 |  | 5.04 (0.98, 25.85) | 0.053 | 0.73 | |
| Yes | 1 (Ref) |  | 1.84 (1.09, 3.10) | 0.023 |  | 2.60 (1.29, 5.25) | 0.008 |  | 1.46 (0.41, 5.12) | 0.558 |  | |
| Peripheral vascular disease |  |  |  |  |  |  |  |  |  |  |  | |
| No | 1 (Ref) |  | 2.15 (1.24, 3.71) | 0.006 |  | 2.46 (1.04, 5.83) | 0.041 |  | 2.50 (0.91, 6.86) | 0.075 | 0.80 | |
| Yes | 1 (Ref) |  | 1.35 (0.62, 2.93) | 0.449 |  | 4.46 (1.69, 11.76) | 0.002 |  | 1.48 (0.17, 13.12) | 0.726 |  | |
| Chronic pulmonary disease |  |  |  |  |  |  |  |  |  |  |  | |
| No | 1 (Ref) |  | 2.64 (1.52, 4.58) | 0.001 |  | 4.01 (1.82, 8.85) | 0.001 |  | 4.31 (1.43, 12.97) | 0.009 | 0.25 | |
| Yes | 1 (Ref) |  | 1.13 (0.54, 2.36) | 0.745 |  | 1.43 (0.45, 4.56) | 0.541 |  | 1.15 (0.27, 4.94) | 0.847 |  | |
| Delirium |  |  |  |  |  |  |  |  |  |  |  | |
| No | 1 (Ref) |  | 2.43 (1.26, 4.71) | 0.008 |  | 4.16 (1.63, 10.67) | 0.003 |  | 2.98 (0.77, 11.55) | 0.114 | 0.56 | |
| Yes | 1 (Ref) |  | 1.44 (0.79, 2.65) | 0.237 |  | 1.99 (0.83, 4.75) | 0.122 |  | 2.15 (0.66, 7.01) | 0.204 |  | |
| Sepsis |  |  |  |  |  |  |  |  |  |  |  | |
| No | 1 (Ref) |  | 1.91 (0.76, 4.79) | 0.166 |  | 5.40 (1.56, 18.70) | 0.008 |  | 1.11 (0.12, 10.49) | 0.928 | 0.16 | |
| Yes | 1 (Ref) |  | 1.76 (1.07, 2.90) | 0.025 |  | 2.16 (1.04, 4.50) | 0.039 |  | 2.66 (1.05, 6.71) | 0.039 |  | |

SHR, Sub-distribution hazard ratio; CI, confidence interval.
